# Supplementary material for: Cytosolic escape of mitochondrial DNA triggers cGAS-STING-NLRP3 axis-dependent nucleus pulposus cell pyroptosis
Source: PubMed Central journal article supplement (PMC8894389; doi:10.1038/s12276-022-00729-9), 2022-02-10
Supplement: 12276_2022_729_MOESM1_ESM.pdf [file 12276_2022_729_MOESM1_ESM.pdf]

Supplementary Table 1. Information of participants

| Case Number | Gender | Age (Years) | Diagnosis              | Segment | MRI Grade | Operation Method                                  |
|-------------|--------|-------------|------------------------|---------|-----------|---------------------------------------------------|
| Case 1      | Male   | 32          | Lumbar disc herniation | L4-L5   | IV        | Percutaneous endoscopic transforaminal discectomy |
| Case 2      | Male   | 15          | Idiopathic scoliosis   | L1-L2   | I         | Open spine surgery                                |
| Case 3      | Male   | 31          | Lumbar disc herniation | L5-S1   | III       | Percutaneous endoscopic transforaminal discectomy |
| Case 4      | Female | 18          | Lumbar disc herniation | L5-S1   | II        | Percutaneous endoscopic transforaminal discectomy |
| Case 5      | Male   | 45          | Lumbar disc herniation | L5-S1   | III       | Percutaneous endoscopic transforaminal discectomy |
| Case 6      | Female | 46          | Lumbar disc herniation | L5-S1   | IV        | Percutaneous endoscopic transforaminal discectomy |
| Case 7      | Male   | 22          | Lumbar disc herniation | L3-L4   | II        | Percutaneous endoscopic transforaminal discectomy |
| Case 8      | Male   | 58          | Lumbar disc herniation | L5-S1   | IV        | Percutaneous endoscopic transforaminal discectomy |
| Case 9      | Female | 14          | Idiopathic scoliosis   | T12-L1  | I         | Open spine surgery                                |
| Case 10     | Male   | 28          | Lumbar disc herniation | L4-L5   | II        | Percutaneous endoscopic transforaminal discectomy |
| Case 11     | Male   | 20          | Idiopathic scoliosis   | L1-L2   | I         | Open spine surgery                                |
| Case 12     | Female | 52          | Lumbar disc herniation | L5-S1   | IV        | Percutaneous endoscopic transforaminal discectomy |
| Case 13     | Female | 42          | Lumbar disc herniation | L4-L5   | III       | Percutaneous endoscopic transforaminal discectomy |
| Case 14     | Female | 12          | Idiopathic scoliosis   | T11-T12 | I         | Open spine surgery                                |
| Case 15     | Male   | 27          | Lumbar disc herniation | L5-S1   | II        | Percutaneous endoscopic transforaminal discectomy |
| Case 16     | Female | 44          | Lumbar disc herniation | L5-S1   | III       | Percutaneous endoscopic transforaminal discectomy |

Supplementary Table 2. Information for antibodies

| Antibodies                              | Source                    | Identifier |
|-----------------------------------------|---------------------------|------------|
| anti-cGAS                               | Proteintech               | 26416-1-AP |
| anti-STING                              | Proteintech               | 19851-1-AP |
| anti-NLRP3                              | Proteintech               | 19771-1-AP |
| anti-ASC                                | Proteintech               | 10500-1-AP |
| anti-CASP-1 / anti-cleaved CASP-1       | Proteintech               | 22915-1-AP |
| anti-GSDMD / anti-cleaved GSDMD         | Proteintech               | 20770-1-AP |
| anti-GAPDH                              | Proteintech               | 60004-1-AP |
| anti-rabbit IgG, HRP-linked antibody    | Cell Signaling Technology | 7074       |
| anti-mouse IgG, HRP-linked antibody     | Cell Signaling Technology | 7076       |
| anti-dsDNA                              | Abcam                     | Ab27156    |
| IgG isotype control monoclonal antibody | Proteintech               | 66360-2-Ig |

Supplementary Table 3. Table of materials for western blotting

| Reagent                                                        | Source  |
|----------------------------------------------------------------|---------|
| Polyvinylidene difluoride membrane (PVDM)                      | Bio-Rad |
| 5% Bovine serum albumin (5% BSA)                               | Boster  |
| 0.1% Tris-buffer saline containing 1:1000 Tween-80 (0.1% TBST) | Boster  |

Supplementary Table 4. Primers used in this study

| Gene Name    | Forward Primer              | Reverse Primer               |
|--------------|-----------------------------|------------------------------|
| Homo-STING   | 5' -CACTTGGATGCTTGCCCTC-3'  | 5' -GCCACGTTGAAATCCCTTTTT-3' |
| Homo-GAPDH   | 5' -CAAGAAGGTGAAGCAGG-3'    | 5' -TCAAAGGTGGAGGAGTGGGT-3'  |
| si-STING     | 5' -GCAUCAAGGAUCGGGUUA-3'   | 5' -UAAACCCGAUCCUUGAUGCTT-3' |
| si-Scrambled | 5' -UUCUCCGAACGUCACGUTT-3'  | 5' -ACGUGACACGUUCGGAGAATT-3' |
| Homo-ND1     | 5' -CTCTTCGTCTGATCCGCCT-3'  | 5' -TGAGGTTGAGGTCTGTTAGT-3'  |
| Homo-ND2     | 5' -GTAGACAGTCCCACCCTCAC-3' | 5' -TTGATCCCGTTTCGTGCAAG-3'  |

Supplementary Table 5. The parameters of radiography images

| <b>X-ray</b>                         |                          |               |              |
|--------------------------------------|--------------------------|---------------|--------------|
| Collimator-to-film distance          | 66 cm                    | Exposure      | 63 mAs       |
| Penetration power                    | 35 kV                    |               |              |
| <b>Micro-CT</b>                      |                          |               |              |
| Voltage                              | 70 kV                    | Current       | 200 $\mu$ A  |
| Resolution                           | 18 $\mu$ m               | Exposure time | 300 ms       |
| <b>MRI (Fast-spin echo sequence)</b> |                          |               |              |
| Time-to-repetition                   | 2000 ms                  | Time-to-echo  | 36 ms        |
| Matrix                               | 256 (h) $\times$ 256 (v) | Field of view | 6.00/3.00 cm |
| Flip angle                           | 180 $^\circ$             |               |              |

Supplementary Table 6. Information of assays/instruments/software used in this study

| Methods                                          | Critical commercial assays/Instruments/Software        | Source                       |
|--------------------------------------------------|--------------------------------------------------------|------------------------------|
| Tyramide signal amplification immunofluorescence | Opal 4-Color Manual IHC Kit                            | PerkinElmer                  |
| RNA reverse transcription                        | HiScript III 1 <sup>st</sup> Strand cDNA Synthesis Kit | Vazyme                       |
| General PCR                                      | 2× Phanta Master Mix                                   | Vazyme                       |
| RT-PCR                                           | ChamQ SYBP Color aPCR Master Mix (High ROX Premixed)   | Vazyme                       |
| Cytosolic mtDNA purification                     | TIANamp Genomic DNA Kit                                | TIANGEN                      |
| Flow cytometer                                   | FACSCalibur flow cytometer                             | BD Biosciences               |
| Microscope                                       | Fluorescence microscope                                | Olympus, BX53, Melville, USA |
| Proximity ligation assay                         | Duolink® In situ PLA® Kit                              | SigmaAldrich                 |
| Transmission electron microscope                 | Techai G2 TWIN TEM                                     | FEI                          |
| Three-dimensional reconstructions of micro-CT    | NRecon software version 1.5                            | Skyscan, Belgium             |

Supplementary Fig. 1 The representative immunofluorescence images and quantitative analysis of fluorescence intensity of STING

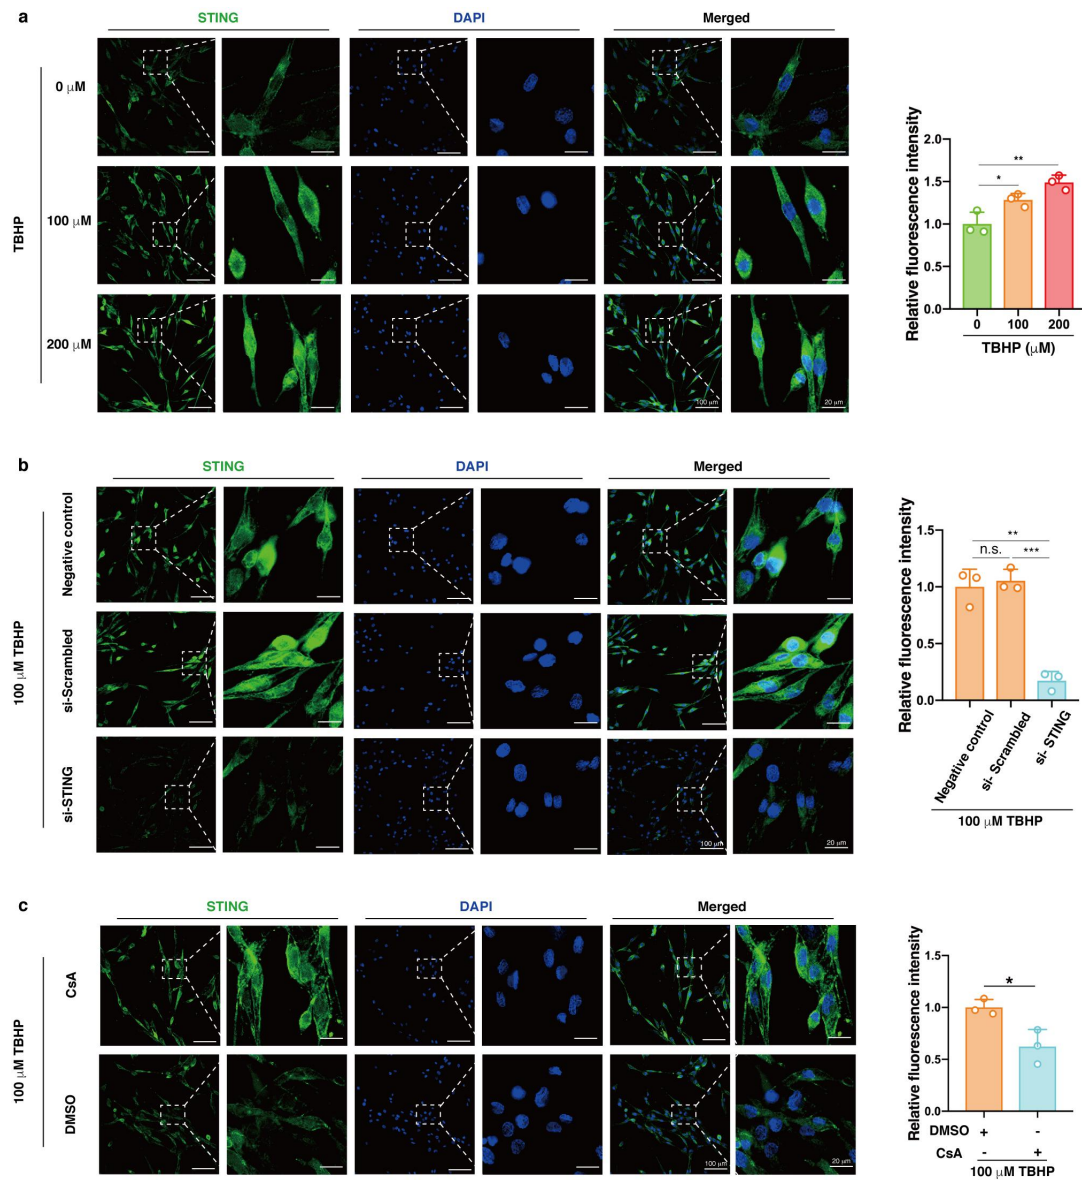

**a** Representative immunofluorescence images of STING with different degrees of polymerization and the quantitative analysis of fluorescence intensity of STING in the TBHP-treated NP cells.

**b** Representative immunofluorescence images of STING with different degrees of polymerization and the quantitative analysis of fluorescence intensity of STING after siRNA knockdown.

**c** Representative immunofluorescence images of STING with different degrees of polymerization and the quantitative analysis of fluorescence intensity of STING in CsA or DMSO-treated NP cells after exposed 100  $\mu\text{M}$  TBHP.

Statistical analyses were conducted using two-way ANOVA and student's t-test. *P* value was described by stars: n.s. no significance, \*  $P < 0.05$ , \*\*  $P < 0.01$ , \*\*\*  $P < 0.001$ .
